# Supplementary material for: FastANI, Mash and Dashing equally differentiate between Klebsiella species
Source: PubMed Central journal article supplement (PMC9308963; doi:10.7717/peerj.13784), 2022-07-21
Supplement: peerj-10-13784-s001.pdf [file peerj-10-13784-s001.pdf]

### Baker's Gamma Index

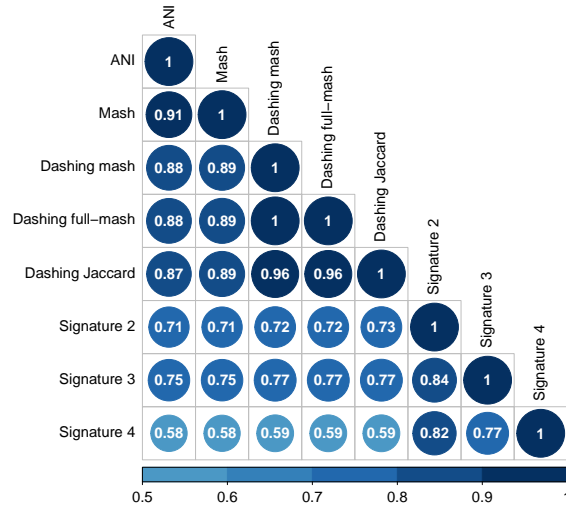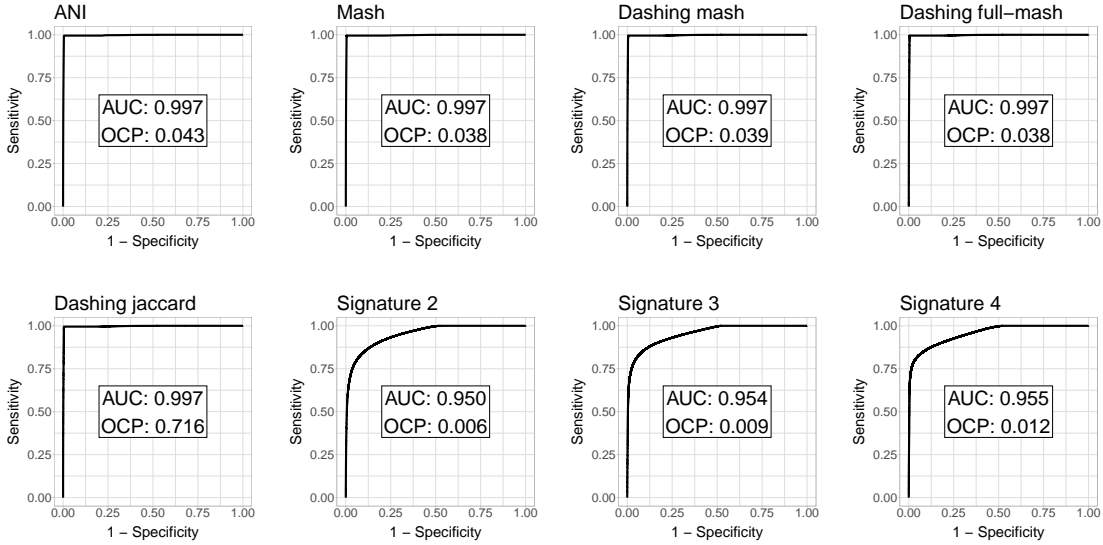

### Optimized cutoff groups

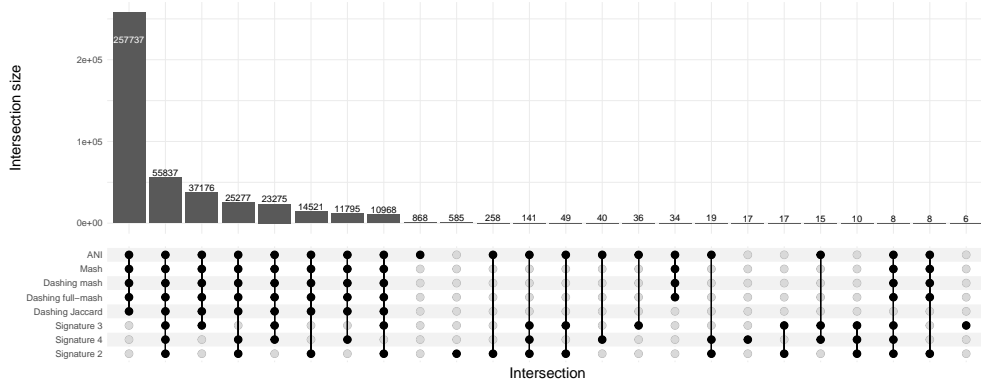

Figure S1.
